# Supplementary material
Source: publisher figshare collection journal article supplement (https://acs.figshare.com/ndownloader/files/14071712)
Supplement: Supplementary file 1 [file 14071712]

# SUPPORTING INFORMATION

## **Solubilization of Pyridone-Based Fluorescent Tag by Complexation in Cucurbit[7]uril**

Reem H. Alzard,<sup>†</sup> Muna S. Bufaroosha,<sup>†</sup> Noura Al-Shamsi,<sup>†</sup> Amir Sohail,<sup>†</sup> Naji Al-Dubaili,<sup>†</sup> Alaa A. Salem,<sup>†</sup> Ibrahim M. Abdou,<sup>†</sup> and Na'il Saleh\*<sup>†</sup>

<sup>†</sup>*Chemistry Department, College of Science, United Arab Emirates University, P. O. Box 15551, Al-Ain, United Arab Emirates*

## TABLE OF CONTENTS

|                                                                                                   |            |
|---------------------------------------------------------------------------------------------------|------------|
| <b>Part I: Titrations.....</b>                                                                    | <b>S3</b>  |
| pH titration of TFP .....                                                                         | S3         |
| pH titration of TFP/CB7.....                                                                      | S4         |
| Binding titration of TFP with CB7 at pH 11.....                                                   | S5         |
| <br><b>Part II: Solvent Effects on Optical Spectra.....</b>                                       | <b>S6</b>  |
| Solvents effects on absorption and emission spectra of TFP .....                                  | S6         |
| Solvents effects on decay-associated spectra of TFP .....                                         | S7         |
| <br><b>Part III: Concentration Effects on NMR Spectra.....</b>                                    | <b>S9</b>  |
| Concentration effects on NMR spectra of TFP in DMSO-d <sub>6</sub> .....                          | S9         |
| Concentration effects on NMR spectra of TFP in CDCl <sub>3</sub> .....                            | S10        |
| <br><b>Part IV: Correlations.....</b>                                                             | <b>S11</b> |
| Correlation of keto/enol ratio measured by NMR with solvent properties.....                       | S11        |
| Correlation of keto/enol ratio measured by NMR with TFP concentrations .....                      | S12        |
| Calculated keto/enol ratio from NMR integrals in CDCl <sub>3</sub> at different concentrations... | S13        |

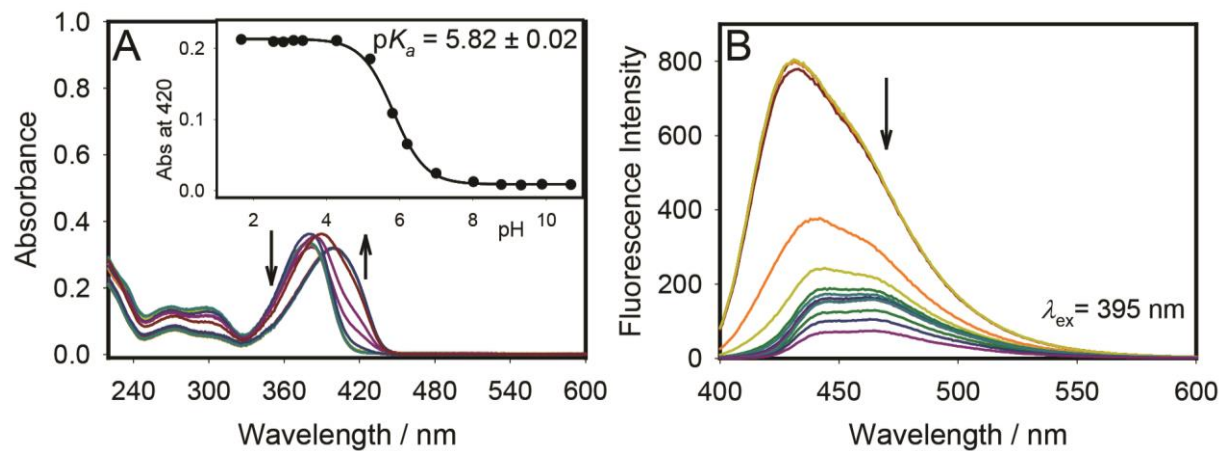

**Figure S1.** pH titration of TFP: panel A shows the evolution of the UV-Vis absorption spectra of TFP (40  $\mu\text{mol/L}$ ) as a function of HCl, together with the corresponding Henderson-Hasselbalch sigmoidal fit. Panel B shows the corresponding changes in emission spectra of TFP (40  $\mu\text{mol/L}$ ) as a function of pH,  $\lambda_{ex} = 395$  nm.

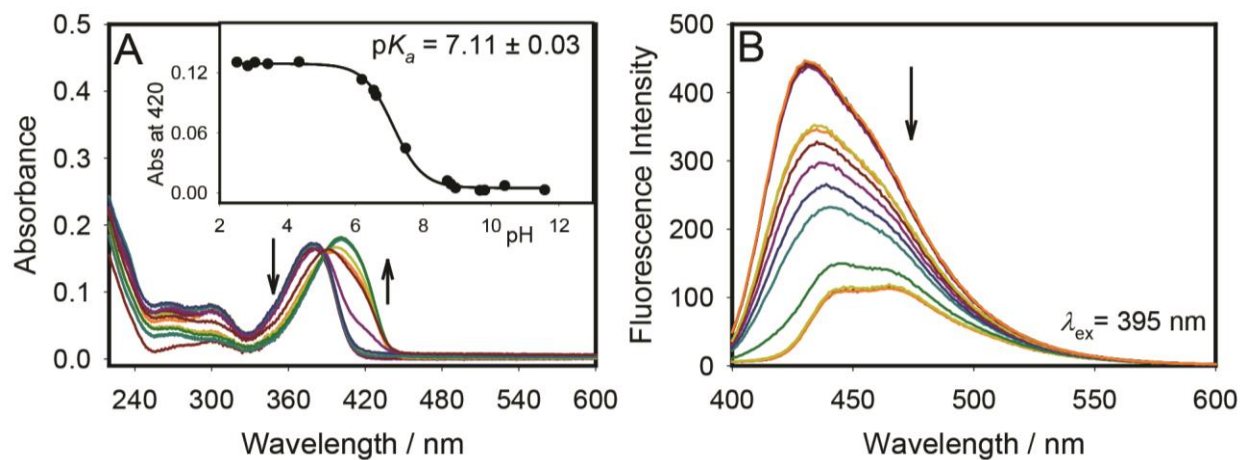

**Figure S2.** pH titration of TFP: panel A shows the evolution of the UV-Vis absorption spectra of TFP (22  $\mu\text{mol/L}$ ) in the presence of CB7 (1 mmol/L) as a function of HCl, together with the corresponding Henderson-Hasselbalch sigmoidal fit. Panel B shows the corresponding changes in emission spectra of TFP (40  $\mu\text{mol/L}$ ) as a function of pH,  $\lambda_{\text{exc}} = 395 \text{ nm}$ .

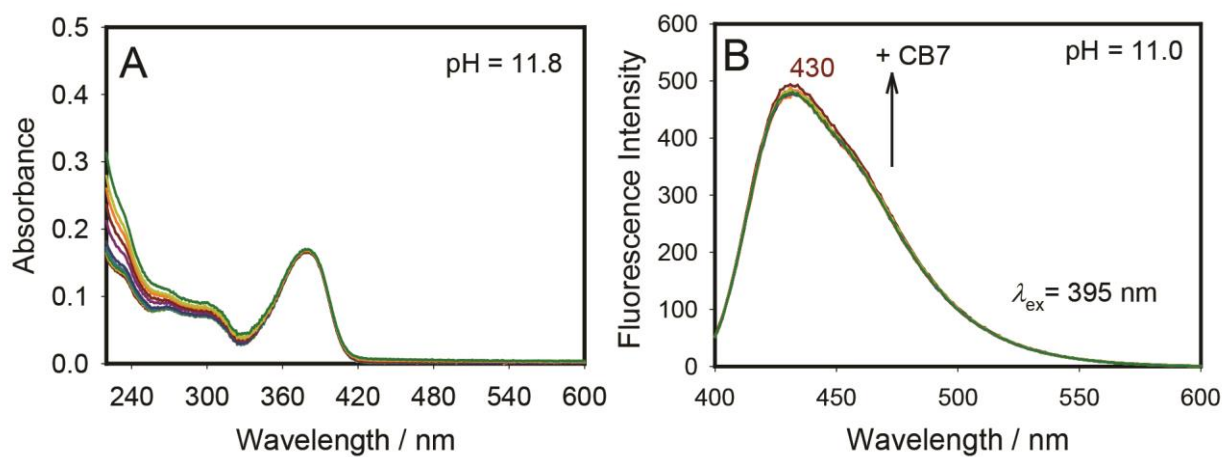

**Figure S3.** Binding titration of TFP with CB7 at pH 11: panel A shows no evolution of the UV-Vis absorption spectra of TFP (22  $\mu\text{mol/L}$ ) with the addition of CB7. Panel B shows the effects of binding to CB7 (0-300  $\mu\text{mol/L}$ ) on the emission spectra of TFP (22  $\mu\text{mol/L}$ ) at the same pH,  $\lambda_{\text{exc}} = 395 \text{ nm}$ .

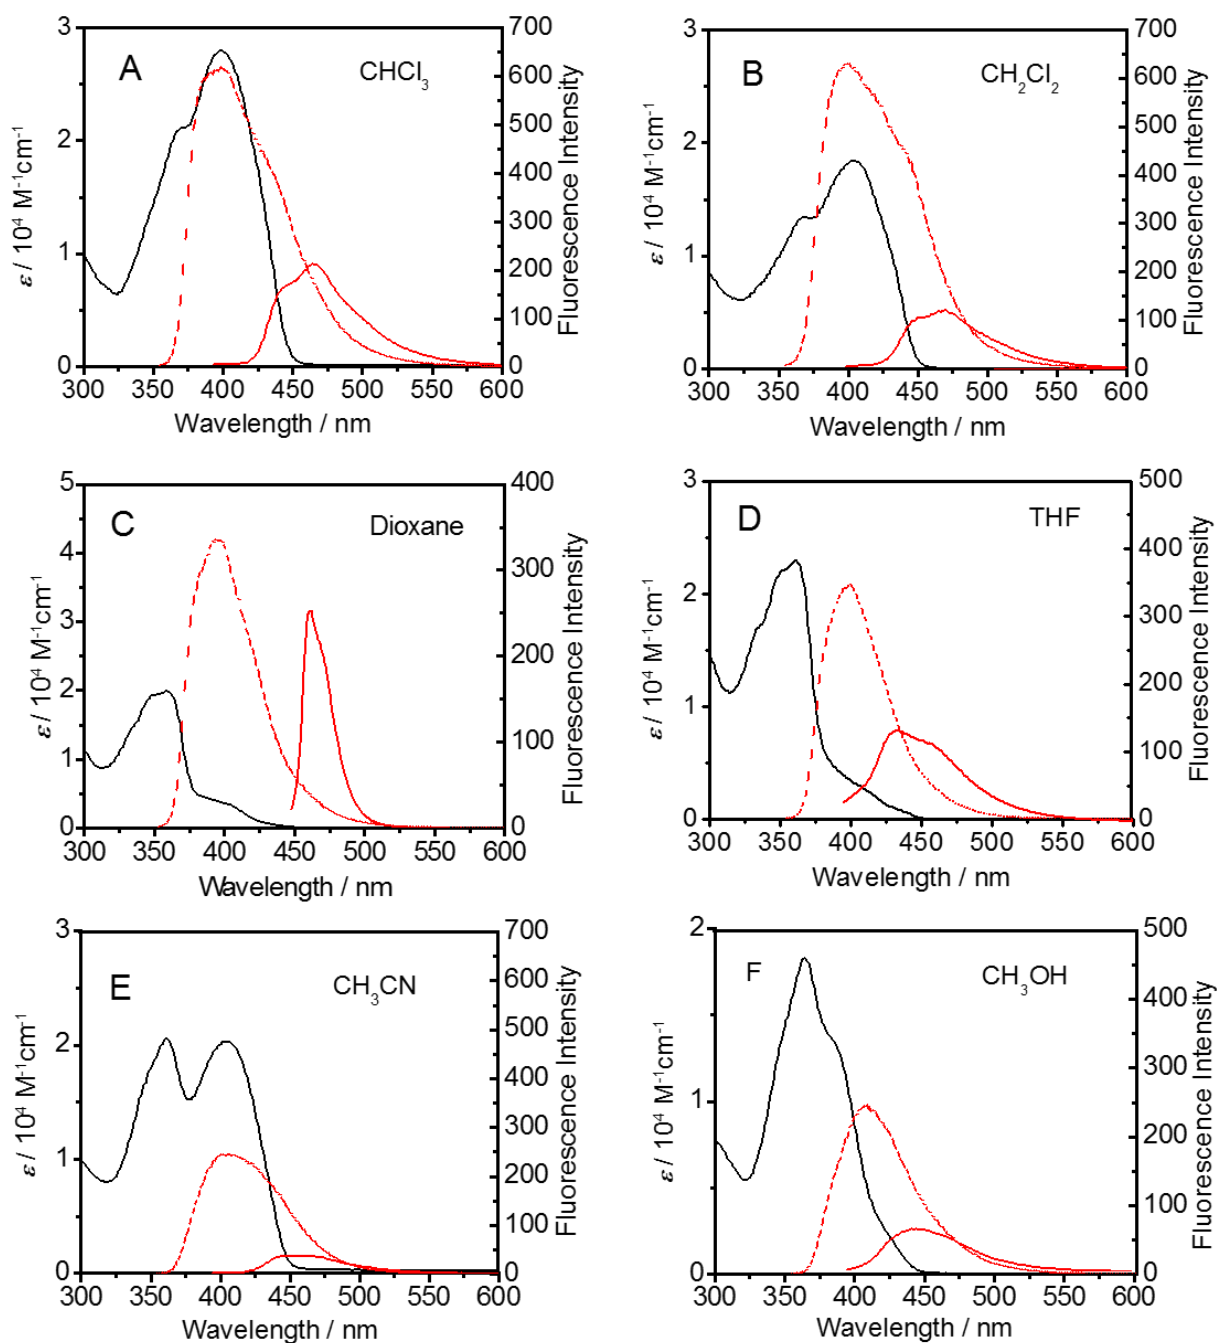

**Figure S4.** Absorption (black) emission (red) spectra ( $\lambda_{\text{exc}} = 350$  nm for enol and 390 nm for keto) of TFP chromophores in different organic solvents in their keto (red solid line) and enol (red dashed line) forms; A:  $\text{CHCl}_3$  = chloroform, B:  $\text{CH}_2\text{Cl}_2$  = dichloromethane, C:  $\text{C}_4\text{H}_8\text{O}_2$  = 1,4-dioxane, D: THF = tetrahydrofurane, E:  $\text{CH}_3\text{CN}$  = acetonitrile, and F:  $\text{CH}_3\text{OH}$  = methanol.

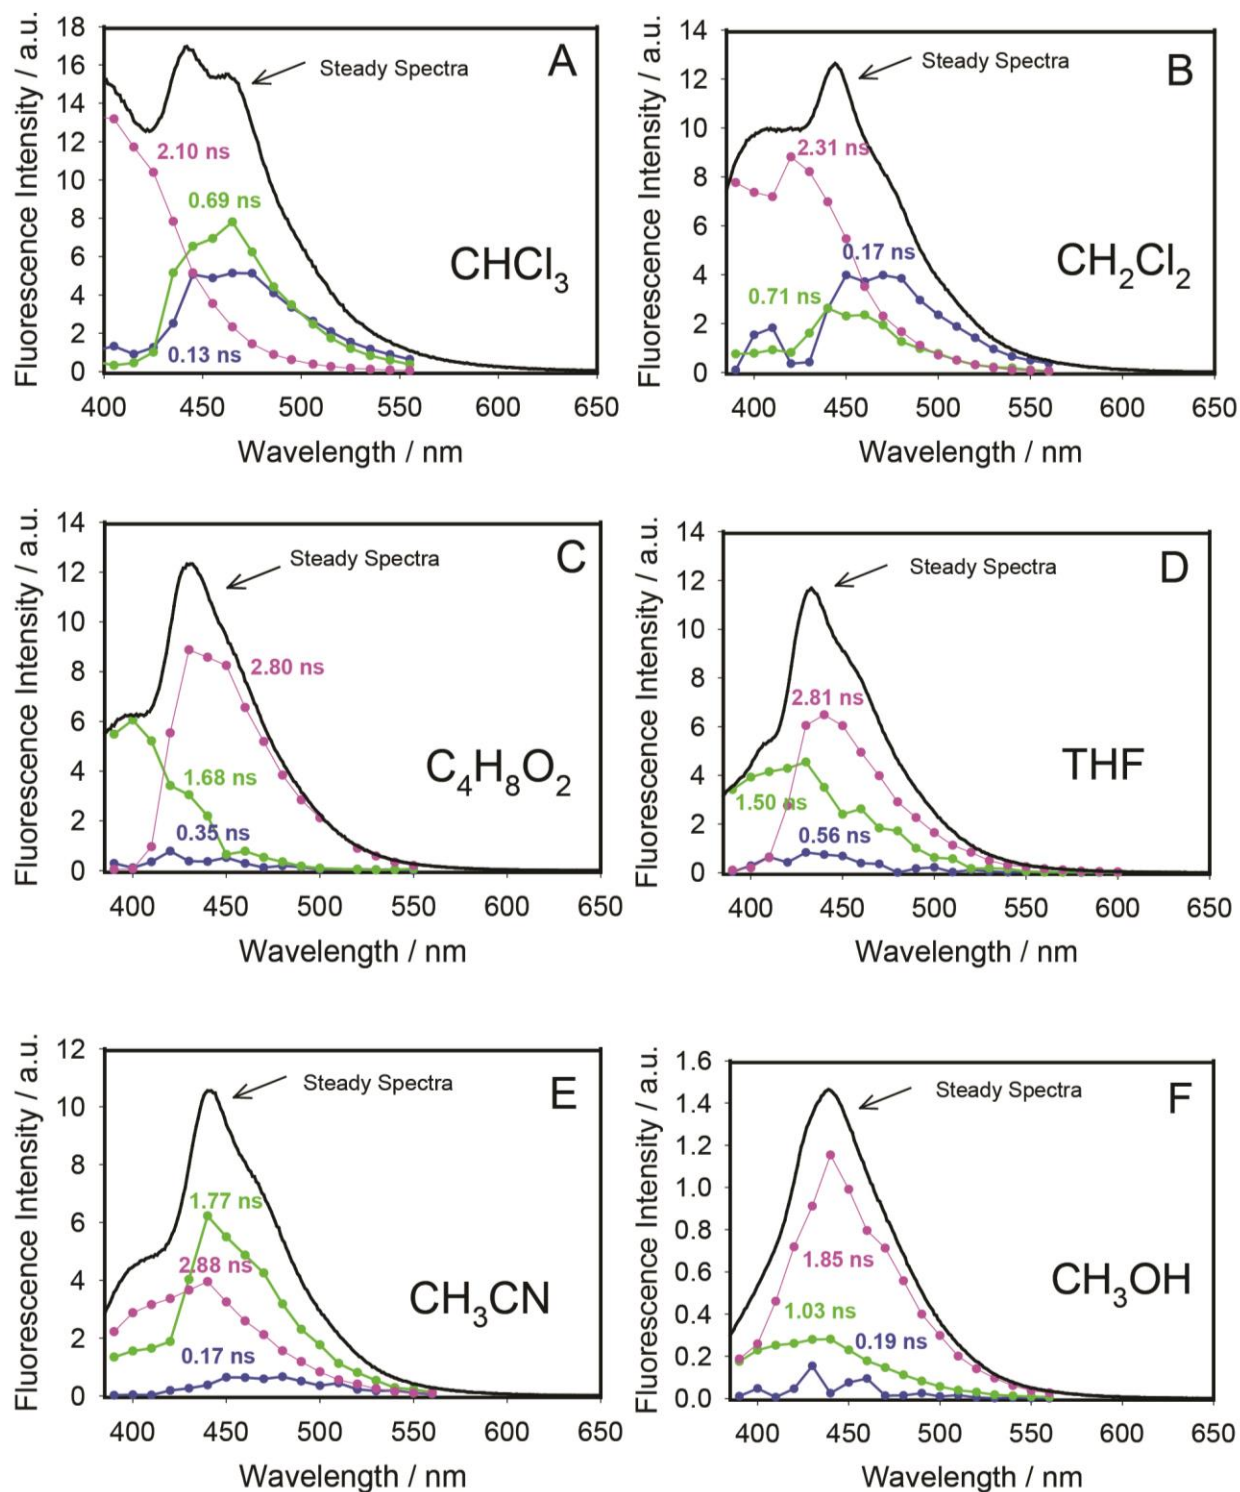

**Figure S5.** Decay-associated spectra (DAS) of three-component mixture of fluorophores for TFP (25  $\mu$ M) in different organic solvents upon excitation at 375 nm and room temperature. The corresponding steady-state spectra of each solution are also shown for comparison (see experimental section); A:  $\text{CHCl}_3$  = chloroform, B:  $\text{CH}_2\text{Cl}_2$  = dichloromethane, C:  $\text{C}_4\text{H}_8\text{O}_2$  = 1,4-dioxane, D: THF = tetrahydrofurane, E:  $\text{CH}_3\text{CN}$  = acetonitrile, F:  $\text{CH}_3\text{OH}$  = methanol, and G: CB7 = cucurbit[7]uril.

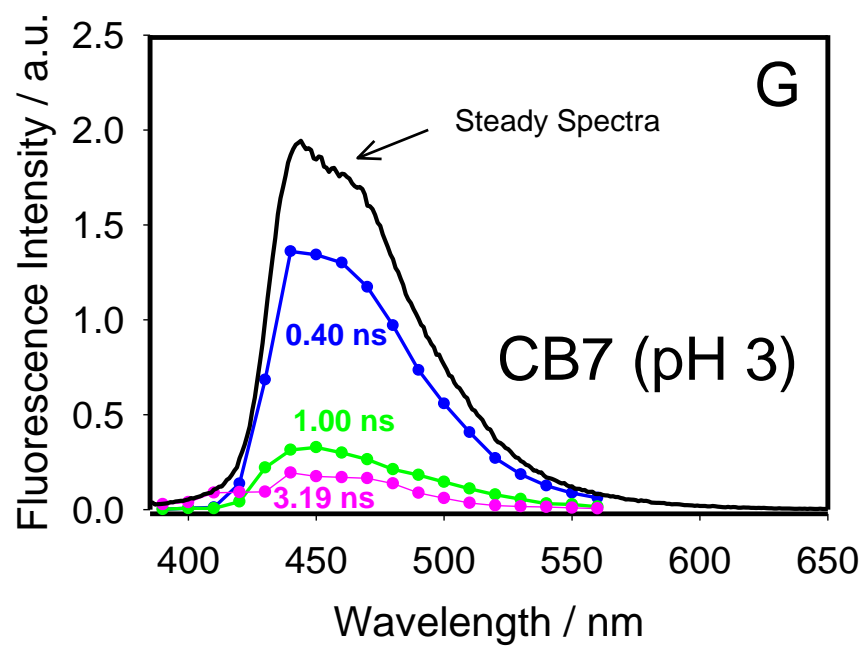

**Figure S5.** Continued.



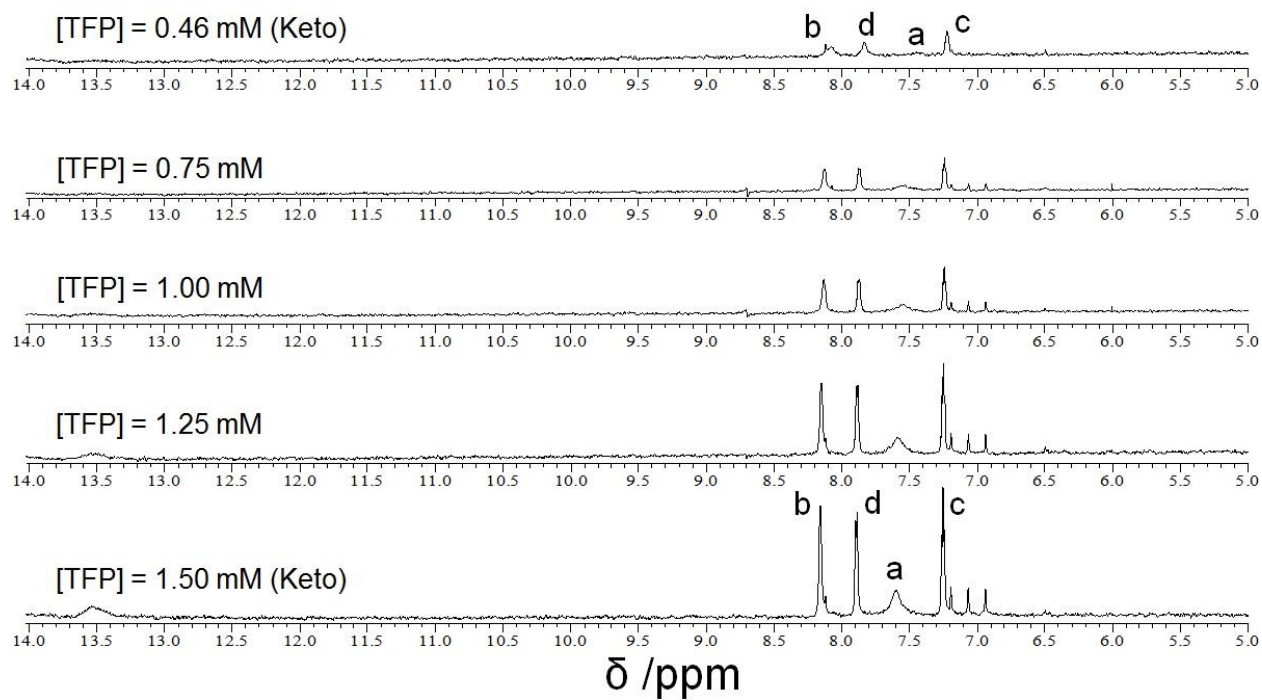

**Figure S6.**  $^1\text{H}$ -NMR spectra of TFP in  $\text{DMSO-d}_6$  at different concentrations. Assignments for peaks are indicated in experimental section.

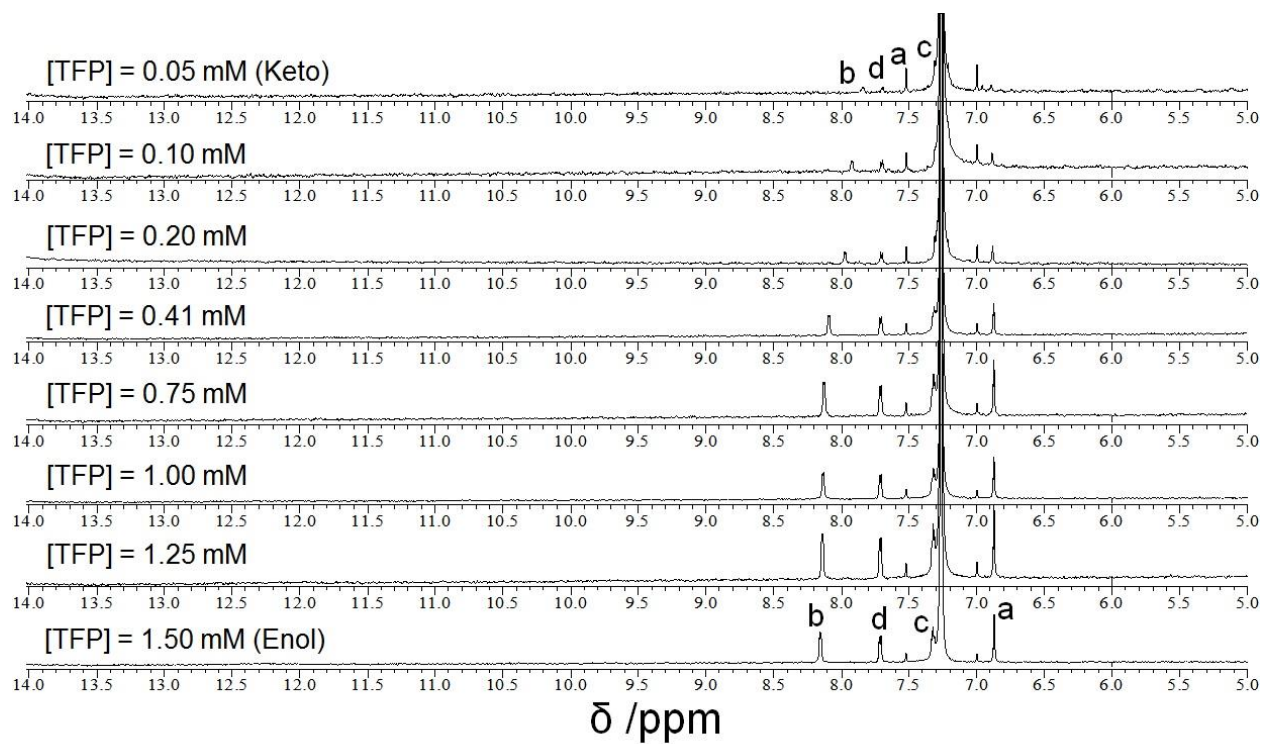

**Figure S7.**  $^1\text{H}$ -NMR spectra of TFP in  $\text{CDCl}_3$  at different concentrations. Assignments for peaks are indicated in experimental section.

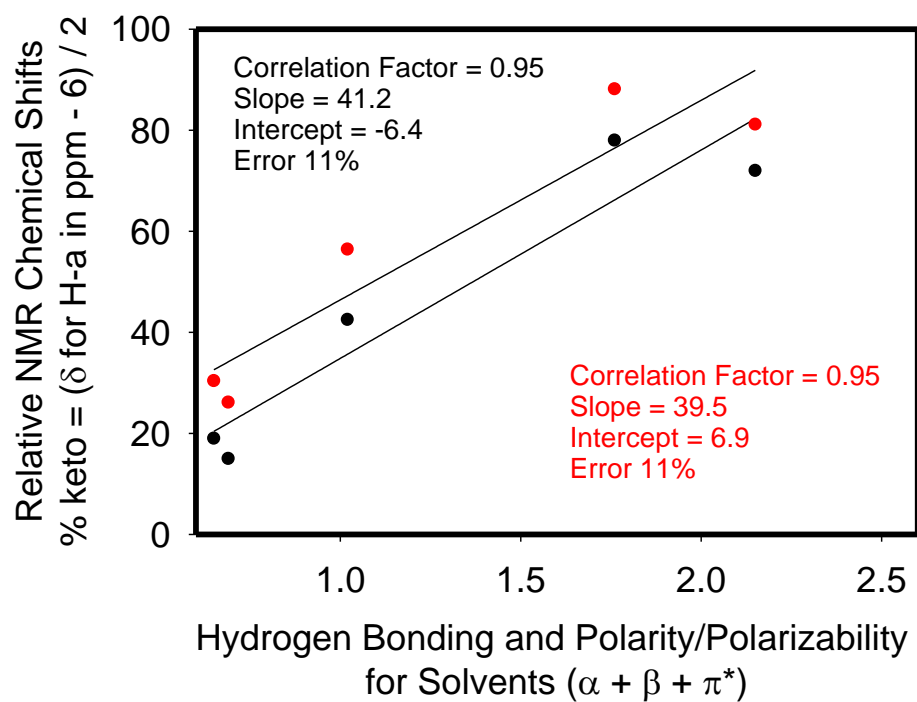

**Figure S8.** Correlation between the relative NMR chemical shifts for H-a proton in TFP with the sum of hydrogen bonding abilities and polarity/polarizability parameter ( $\alpha + \beta + \pi^*$ ) for different solvents. The extrapolated plot for micromolar concentration is shown in red, see text.

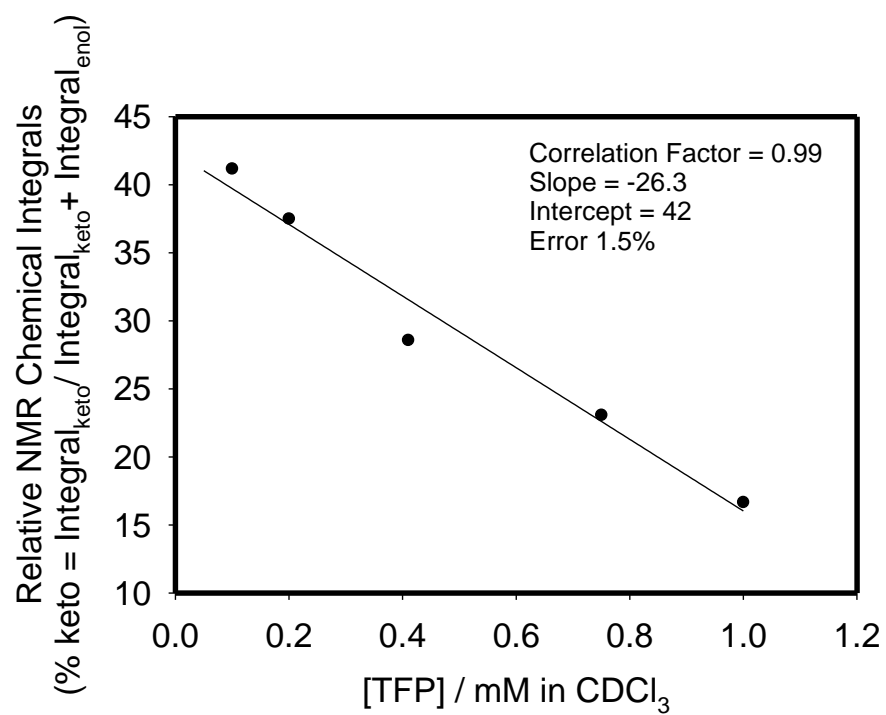

**Figure S9.** Correlation between the relative NMR chemical integrals for H-a proton in TFP (see Table S1) with the concentrations of TFP in millimolar in  $\text{CDCl}_3$ .

**Table S1.** The calculated percentage for keto form of TFP by using the integration areas for the NMR peaks of proton H<sub>a</sub> at 6.9 ppm (enol) and 7.6 ppm (keto) and as a function of TFP concentrations in millimolar (mM).

| TFP<br>Concentration<br>in CDCl <sub>3</sub> /<br>mM | Integral<br>area of<br>enol<br>signal | Integral<br>area of<br>keto<br>signal | % keto<br>$= \frac{\textit{Integral area of keto signal}}{\textit{Integral area of enol} + \textit{Integral area of keto}}$ |
|------------------------------------------------------|---------------------------------------|---------------------------------------|-----------------------------------------------------------------------------------------------------------------------------|
| 0.05                                                 | 1                                     | 1.5                                   | 60 (41 from extrapolation)                                                                                                  |
| 0.10                                                 | 1                                     | 0.7                                   | 41                                                                                                                          |
| 0.20                                                 | 1                                     | 0.6                                   | 37                                                                                                                          |
| 0.41                                                 | 1                                     | 0.4                                   | 28                                                                                                                          |
| 0.75                                                 | 1                                     | 0.3                                   | 23                                                                                                                          |
| 1.00                                                 | 1                                     | 0.2                                   | 17                                                                                                                          |
| 1.25                                                 | 1                                     | 0.2                                   | 17                                                                                                                          |
| 1.50                                                 | 1                                     | 0.2                                   | 17                                                                                                                          |
